# Supplementary material for: Self-assembled reduced graphene hydrogels by facile chemical reduction using acetaldehyde oxime for electrode materials in supercapacitors
Source: Royal Society of Chemistry journal article supplement (doi:10.1039/c6ra04348h), 2016-01-01
Supplement: c6ra04348h1.pdf [file c6ra04348h1.pdf]

**Self-assembled reduced graphene hydrogels by facile chemical  
reduction using acetaldehyde oxime for electrode materials in  
supercapacitors**

Man Jiang,<sup>a</sup> Jing-Li Zhang,<sup>b</sup> Fei Qiao,<sup>b</sup> Rui-Ying Zhang,<sup>b</sup> Ling-Bao Xing,<sup>b\*</sup> Jin  
Zhou,<sup>b</sup> Hongyou Cui,<sup>b</sup> Shuping Zhuo<sup>b\*</sup>

<sup>a</sup>Resources and Environmental Engineering, Shandong University of Technology,  
Zibo 255049, P. R. China

<sup>b</sup>School of Chemical Engineering, Shandong University of Technology, Zibo 255049,  
P. R. China

\*Corresponding author: Tel. /fax: +86 533 2781664. E-mail: lbxing@sdut.edu.cn (L.-  
B. Xing); zhuosp\_academic@yahoo.com (S. Zhuo).

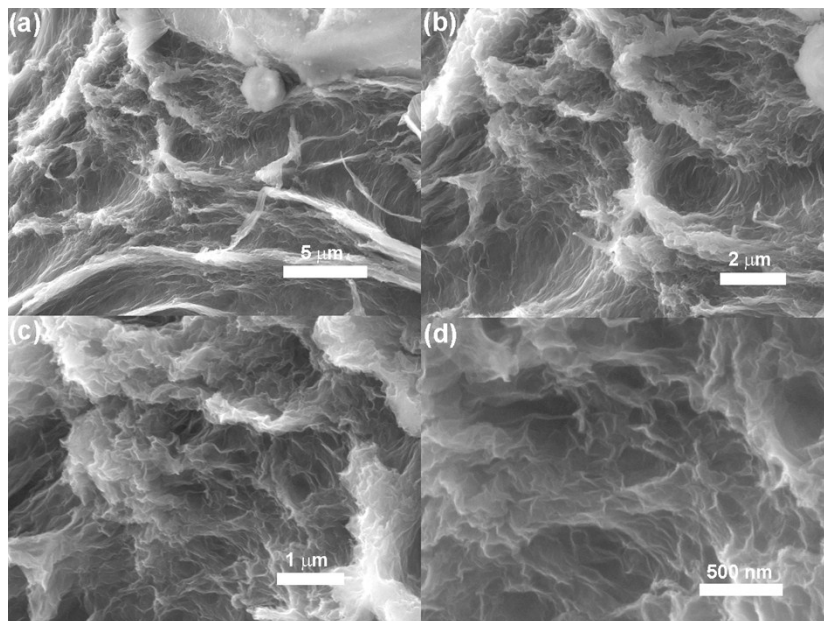

**Fig. S1** SEM images of RGHS-1 of the interior microstructures with different magnifications.

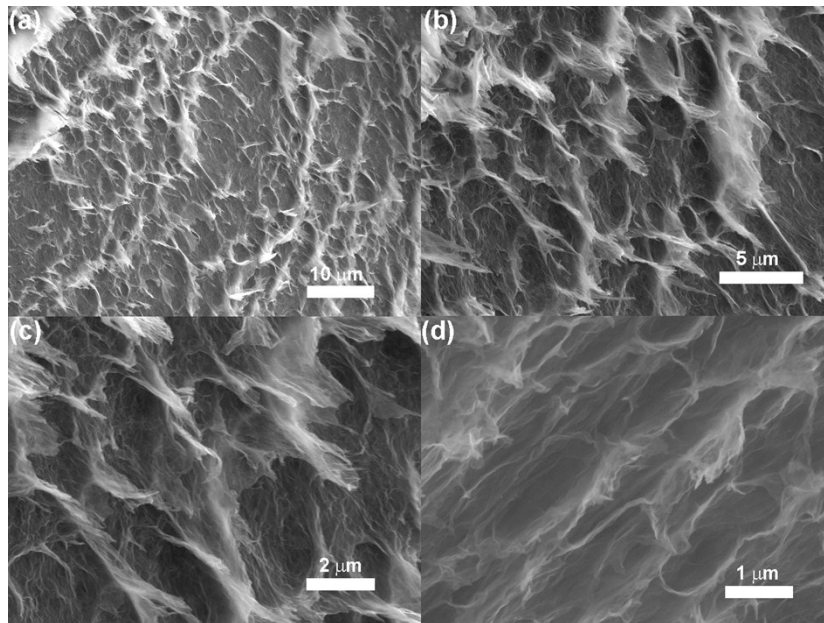

**Fig. S2** SEM images of RGHS-2 of the interior microstructures with different magnifications.

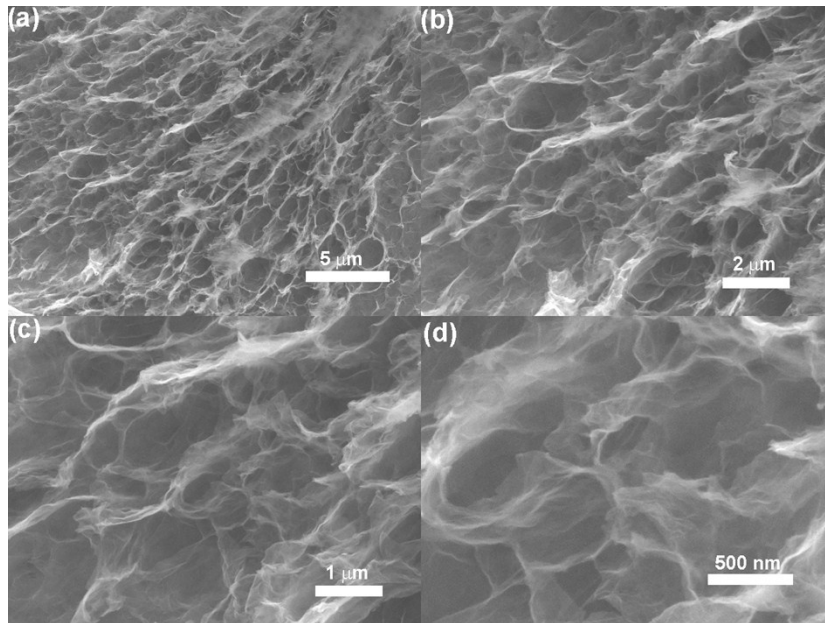

**Fig. S3** SEM images of RGHS-10 of the interior microstructures with different magnifications.

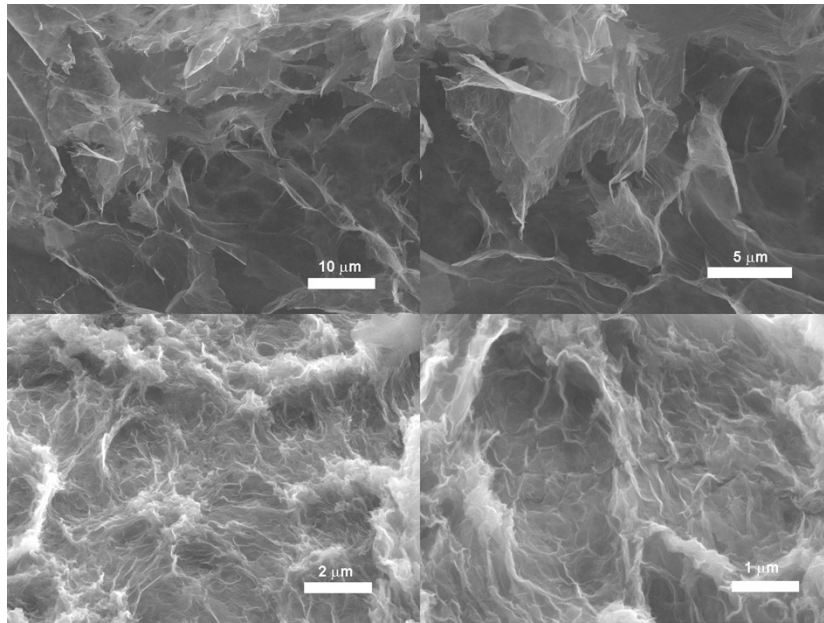

**Fig. S4** SEM images of RGHS-15 of the interior microstructures with different magnifications.

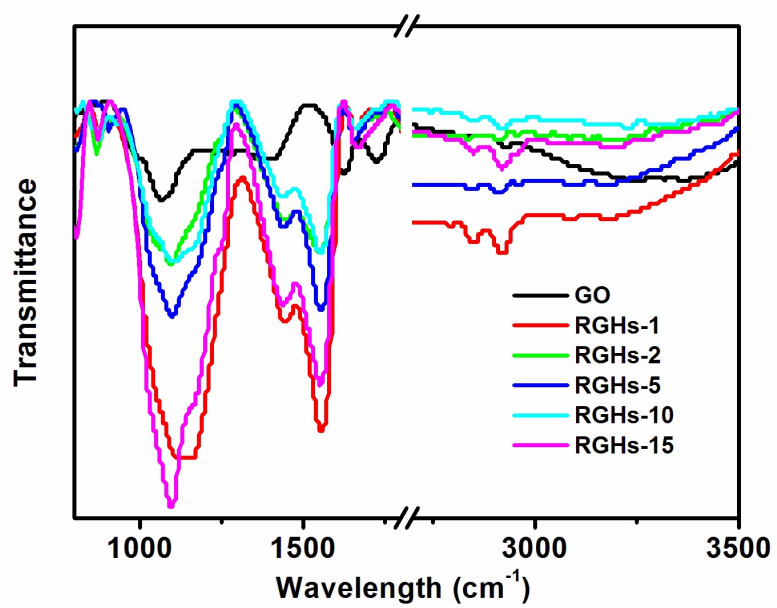

Fig. S5 FTIR spectra of RGHs.

**Table S1.** The relative elemental analysis (mass %) of C, H, O and N in GO and RGHs.

| <b>sample</b>  | <b>C [mass%]</b> | <b>H [mass%]</b> | <b>O [mass%]</b> | <b>N [mass%]</b> |
|----------------|------------------|------------------|------------------|------------------|
| <b>GO</b>      | 42.60            | 6.50             | 50.90            | -                |
| <b>RGHs-1</b>  | 64.39            | 2.45             | 25.51            | 7.65             |
| <b>RGHs-2</b>  | 64.33            | 2.45             | 25.42            | 7.80             |
| <b>RGHs-5</b>  | 63.77            | 2.52             | 25.62            | 8.09             |
| <b>RGHs-10</b> | 64.33            | 2.46             | 25.05            | 8.16             |
| <b>RGHs-15</b> | 63.57            | 2.60             | 25.46            | 8.37             |

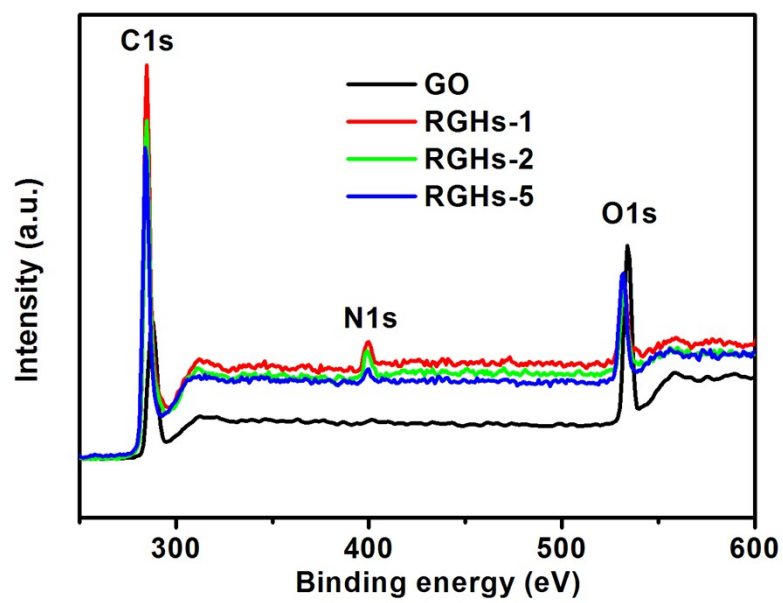

**Fig. S6** XPS survey spectra of RGHs.



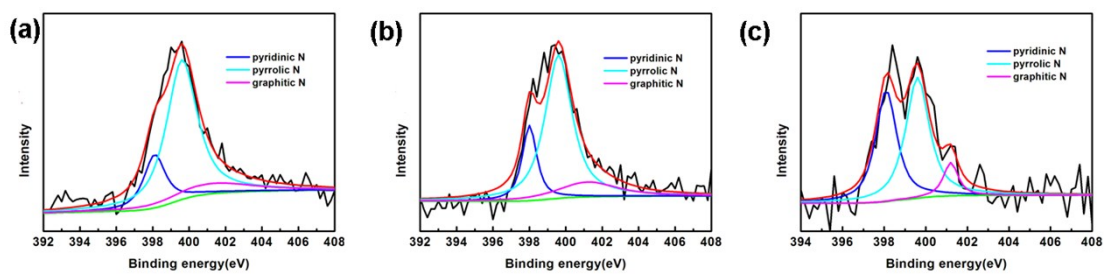

**Fig. S7** High-resolution XPS spectra of N1s peaks for RGHs-1 (a), RGHs-2 (b) and RGHs-5 (c).

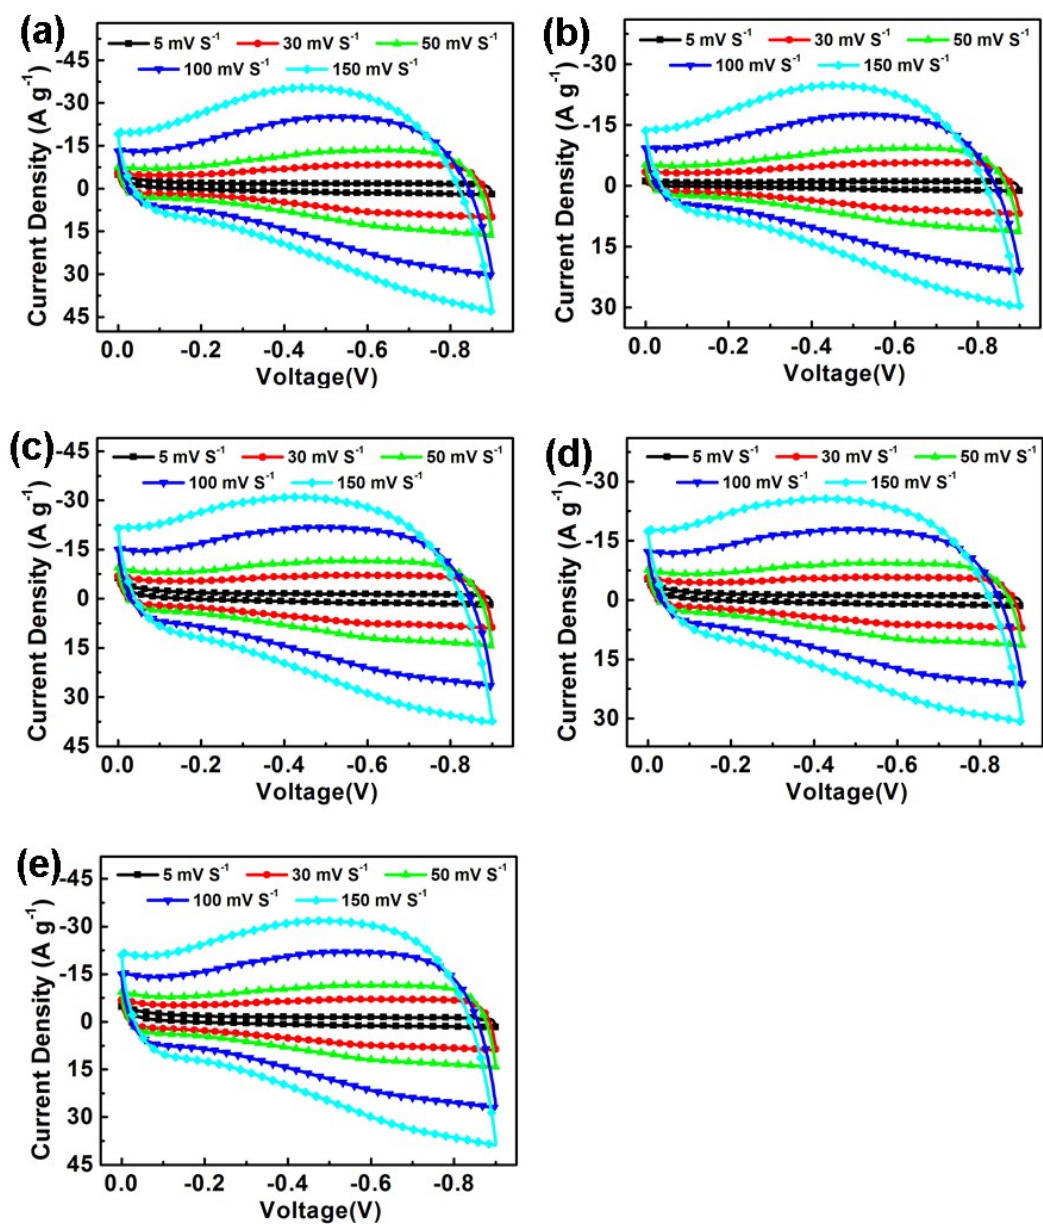

**Fig. S8** Cyclic voltammograms of the supercapacitor based on RGHs at different scan rates from 5 to 150 mV s<sup>-1</sup>.

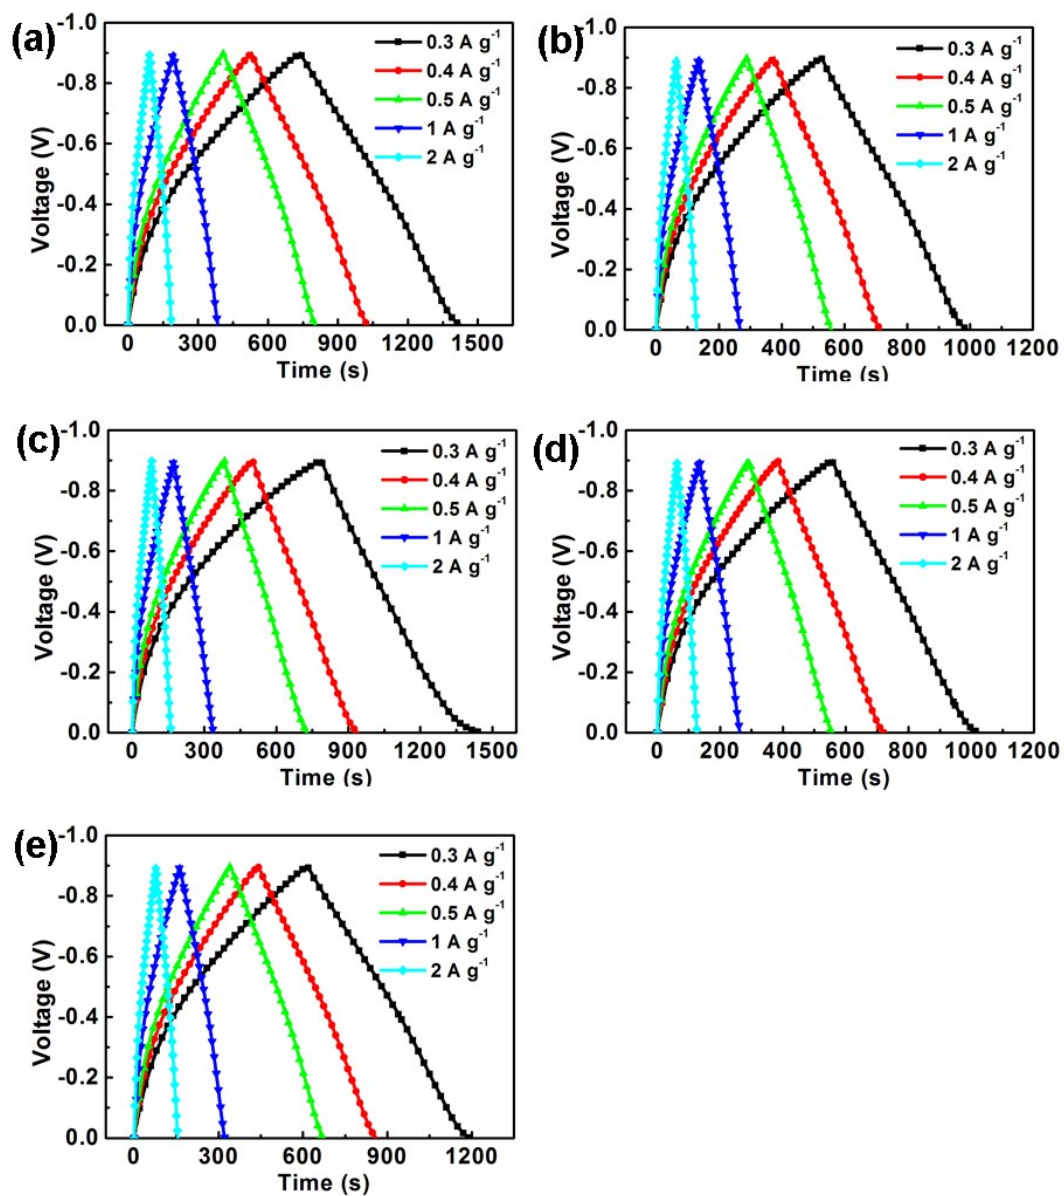

**Fig. S9** galvanostatic charge/discharge curves of RGHs at different charging/discharging current density from 0.3 to 2 A g<sup>-1</sup>.
